# Supplementary material for: V-Domain Ig Suppressor of T Cell Activation (VISTA) Expression Is an Independent Prognostic Factor in Multiple Myeloma
Source: MDPI journal article supplement (doi:10.3390/cancers13092219), 2021-05-06
Supplement: s1 [file s1]

Patient 1

A

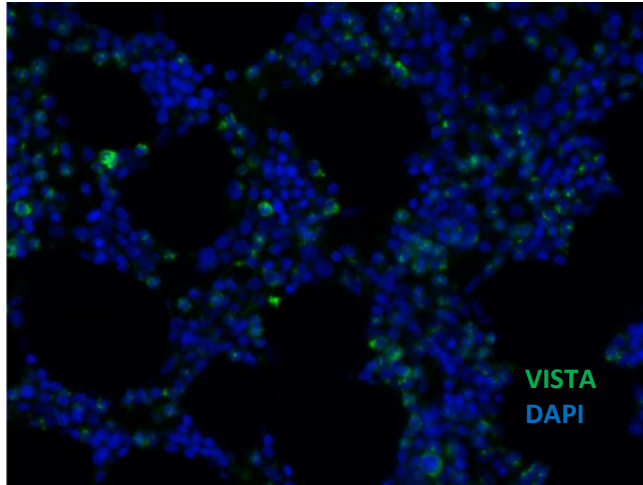

Patient 2

B

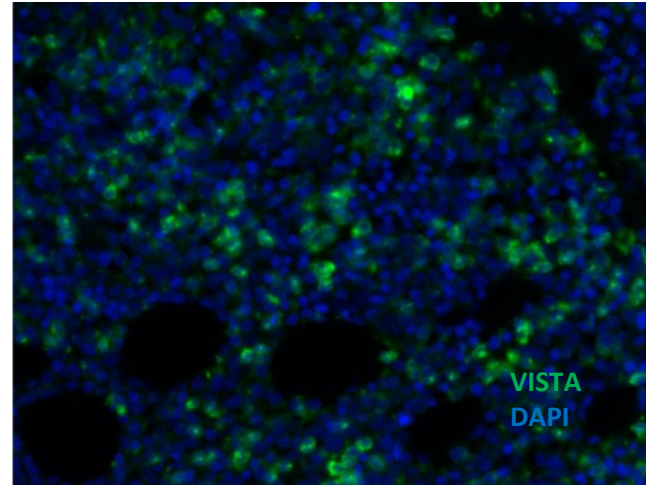

C

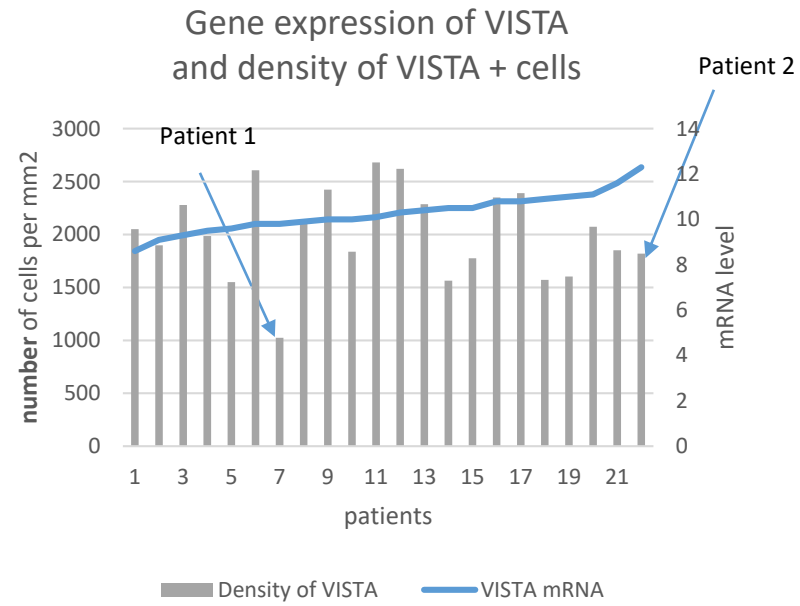

Supplementary figure 1: Density of VISTA+ cells does not concur with VISTA gene expression in MM.

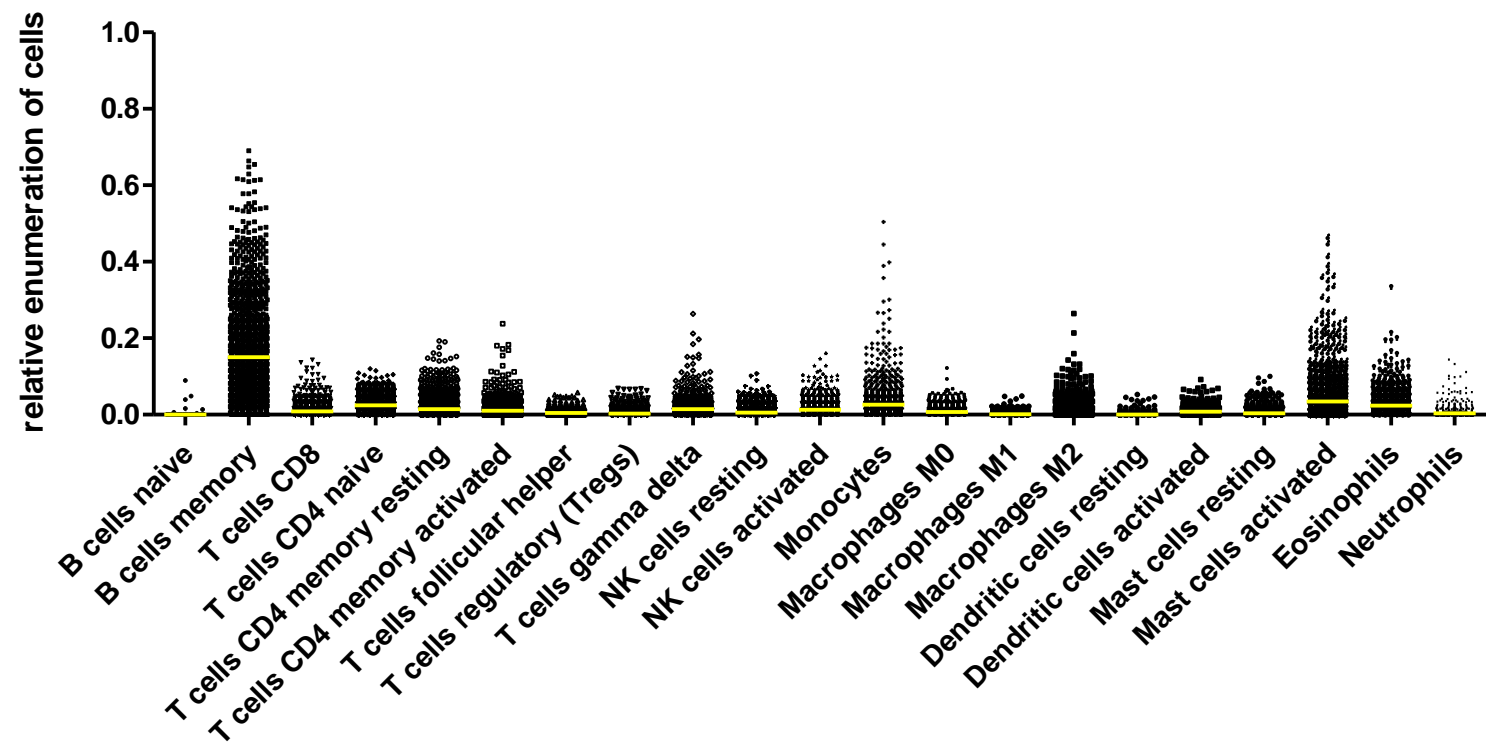

Supplementary Figure 2. FACS sorted plasma cells from bone marrow with 90% purity for CD138 contain significant amounts of immune cells

Multiple Myeloma panel (number indicates position of primary antibody):

1. CD8 (C8/114B, Sanbio, 1:200) – OPAL570; 2. VISTA (D1L2G, Cell Signaling Technologies, 1:100) – OPAL520; 3. CD11b (EP1345Y, Abcam, 1: 250) – OPAL620; 4. CD138 (B-A38, Cell Marque, 1:40) – OPAL690; 5. DAPI.

Immune suppressor panel (number indicates position of primary antibody):

1. CD4 (EP204, Cell Marque 1:100) – OPAL570; 2. CD8 (C8/144b, Sanbio, 1:200) – OPAL620; 3. Foxp3 (236A/E7, Abcam, 1:200) – OPAL650; 4. VISTA (D1L2G, Cell Signaling Technologies, 1:100) – OPAL520; 5. CD163 (MRQ26, Cell Marque, 1:50) – OPAL540; 6. CD11b (EP1345Y, Abcam, 1:200) – OPAL690; 7. DAPI.

**Supplementary Table 1. Antibody panels used for immunofluorescence**

| OS analysis in 470 patients; [H65 (n=324) and H87 (n=146)] |               |             |          |  |                 |          |
|------------------------------------------------------------|---------------|-------------|----------|--|-----------------|----------|
|                                                            | OS univariate |             |          |  | OS multivariate |          |
|                                                            | HR            | [95%CI]     | p value  |  | HR              | p value  |
| VISTA                                                      | 0.72          | [0.60-0.87] | 6.19E-04 |  | 0.74            | 1.61E-03 |
| Purity of CD138+ cells                                     | 1.02          | [1.00-1.04] | 0.054    |  | 1.01            | 0.959    |
| logodds(purity)                                            | 1.14          | [0.99-1.3]  | 0.0641   |  | 1.01            | 0.637    |

Supplementary Table 2. Purity of CD138+ plasma cells does not confound prognostic value of VISTA gene expression.

| Treatment arm | Age | Sex | VISTA mRNA expression | Albumin [g/l] | Serum B2-microglobulin [mg/l] | 1p- | 1q(21) 1q | 13q14- | 17p13- | t(4;14)(p16;q32) | t(11;14)(q13;q32) | t(14;16)(q32;q23) | VISTA driven CD8 exclusion |
|---------------|-----|-----|-----------------------|---------------|-------------------------------|-----|-----------|--------|--------|------------------|-------------------|-------------------|----------------------------|
| MPT           | M   | 76  | 10,5                  | 21            | 6,8                           | no  | no        | yes    | no     | no               | no                | no                | 0,90                       |
|               | F   | 78  | 10,4                  | 36,3          | 2,8                           | no  | no        | no     | no     | no               | no                | no                | 1,22                       |
|               | F   | 78  | 10,8                  | 37            | 3,1                           | no  | no        | yes    | yes    | no               | no                | no                | 0,78                       |
|               | M   | 81  | 10                    | 29            | 6,2                           | no  | no        | no     | no     | no               | no                | no                | 1,25                       |
|               | F   | 74  | 10,8                  | 42,5          | na                            |     |           |        |        |                  |                   |                   | 1,26                       |
|               | F   | 69  | 8,6                   | 28            | 5                             | no  | no        | no     | no     | no               | no                | no                | 0,74                       |
|               | M   | 68  | 9,3                   | 44,7          | 2,3                           | no  | yes       | yes    | no     | yes              | no                | no                | 0,88                       |
|               | F   | 68  | 9,1                   | 41            | 2,4                           |     |           | yes    |        | no               |                   |                   | 2,29                       |
|               | F   | 68  | 10,3                  | 43            | 4,2                           |     |           | no     | no     | no               | no                | no                | 0,55                       |
|               | F   | 71  | 9,8                   | 30,4          | 4,8                           | no  | yes       | yes    | no     | yes              | no                | no                | 1,41                       |
|               | M   | 71  | 9,8                   | 28,5          | 3,8                           |     |           | no     | no     | no               |                   |                   | 1,30                       |
| MPR           | F   | 70  | 11,1                  | 36,4          | 2,3                           |     |           | no     | no     | no               |                   |                   | 1,50                       |
|               | F   | 81  | 10,9                  | 34            | 4,5                           | no  | no        | no     | no     | no               | no                | no                | 0,98                       |
|               | F   | 73  | 11                    | 31,5          | na                            | no  | no        | no     | no     | no               | no                | no                | 1,09                       |
|               | M   | 69  | 10,5                  | 38,1          | 8,2                           |     | no        | yes    | no     | no               |                   | no                | 1,42                       |
|               | M   | 80  | 9,5                   | 35,6          | 17,4                          | no  | no        | no     | no     | no               | no                | no                | 1,32                       |
|               | F   | 75  | 10                    | 36            | 5,4                           | no  | no        | yes    | no     | no               | no                | yes               | 1,35                       |
|               | F   | 82  | 10,1                  | 36,3          | 3,5                           |     |           | yes    | no     | yes              |                   |                   | 1,70                       |
|               | M   | 71  | 11,6                  | 50            | 12,7                          | no  | no        | no     | no     | no               | no                | no                | 1,43                       |
|               | M   | 71  | 9,9                   | 24            | na                            |     | yes       | yes    |        |                  |                   |                   | 0,85                       |
|               | M   | 69  | 12,3                  | 36,1          | 7,6                           | no  | yes       | yes    | no     | no               | no                | no                | 1,33                       |
|               | M   | 76  | 9,6                   | 34            | 3,7                           | no  | yes       | yes    | no     | no               | no                | no                | 1,55                       |

**Supplementary Table 3. Characteristics of patients treated in the HOV087/NMSG18 trial, and whose tumors were used for in situ stainings.**

MPT: melphalan, prednisolone and thalidomide; MPR: melphalan, prednisolone and lenalidomide.
